# Supplementary material
Source: HighWire-hosted journal article supplement (https://www.rcpjournals.org/highwire/filestream/13925/field_highwire_adjunct_files/1/Subbe_supplementary_material_S2.pdf)

Supplementary material S2.

Fig S1. Numerical rating dyspnoea scale

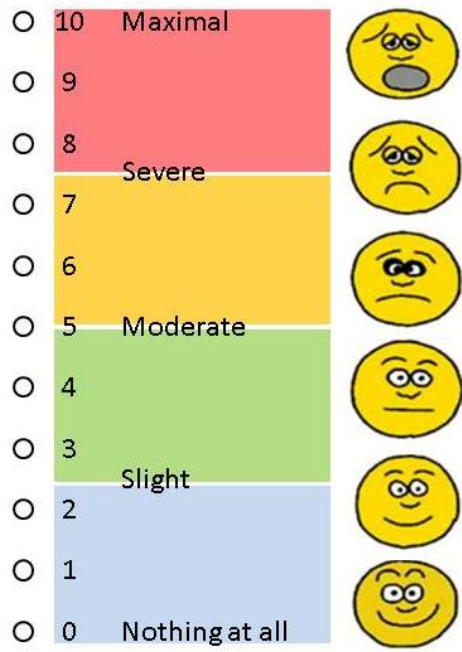

Supplement: Subbe_supplementary_material_S2.pdf [file Subbe_supplementary_material_S2.pdf]
